# Supplementary material for: Tailoring vanadium oxide crystal orientation for high-performance aqueous zinc-ion batteries
Source: Royal Society of Chemistry journal article supplement (doi:10.1039/d4dt00012a), 2024-01-01
Supplement: d4dt00012a1.pdf [file d4dt00012a1.pdf]

## Supporting Information

### Tailoring vanadium oxide crystal orientation for high-performance aqueous zinc-ion batteries

Rong Li,<sup>a, b</sup> Yifei Yuan,<sup>a, b</sup> Linyu Yang,<sup>\*a, b</sup> Jun Wang,<sup>\*c</sup> Shuying Wang,<sup>\*a, b</sup> Ablat Abliz,<sup>a, b</sup> Xuefang Xie,<sup>a, b</sup>  
Hongyu Mi,<sup>d</sup> Haibing Li<sup>e</sup>

<sup>a</sup> Xinjiang Key Laboratory of Solid State Physics and Devices, Xinjiang University, Urumqi 830046, PR China. E-mail: [yanglinyu0222@sina.com](mailto:yanglinyu0222@sina.com); [wsysmilerr@sina.com](mailto:wsysmilerr@sina.com)

<sup>b</sup> School of physics and technology, Xin Jiang University, Urumqi, Xinjiang 830046, China.

<sup>c</sup> School of Innovation and Entrepreneurship, Southern University of Science and Technology, Shenzhen 518055, China. E-mail: [wangj9@sustech.edu.cn](mailto:wangj9@sustech.edu.cn)

<sup>d</sup> School of Chemical Engineering and Technology, Xinjiang University, Urumqi 830046, China.

<sup>e</sup> Xinjiang Uygur Autonomous Region Research Institute of Measurement and Testing, Urumqi 830011, China.

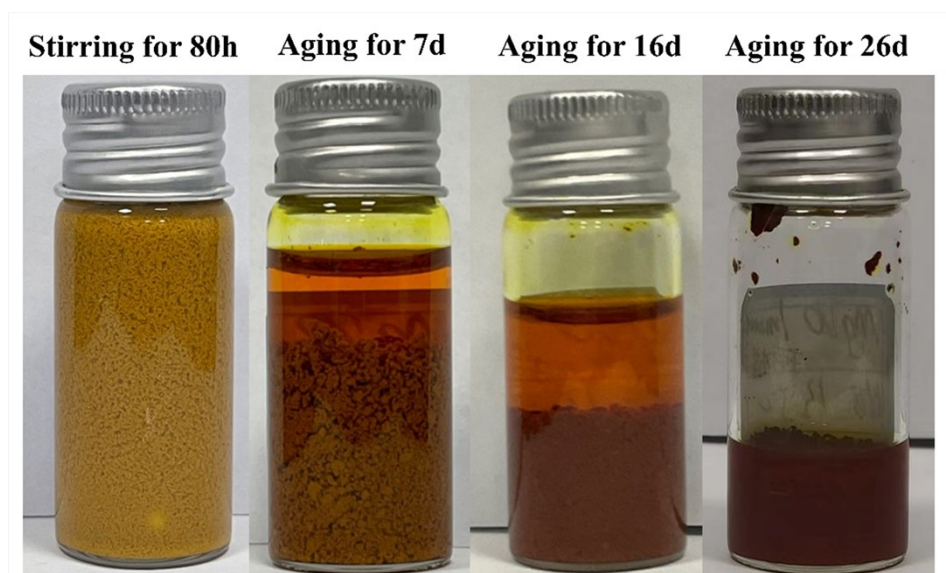

Figure S1. MgVO sample is stirred for 80h, aged for 7, 16 and 26 days respectively (Photographs taken after retrieval of samples).

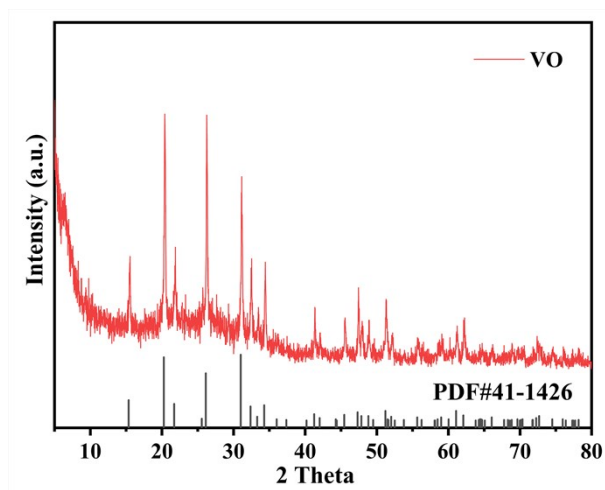

Figure S2. The XRDs of VO.

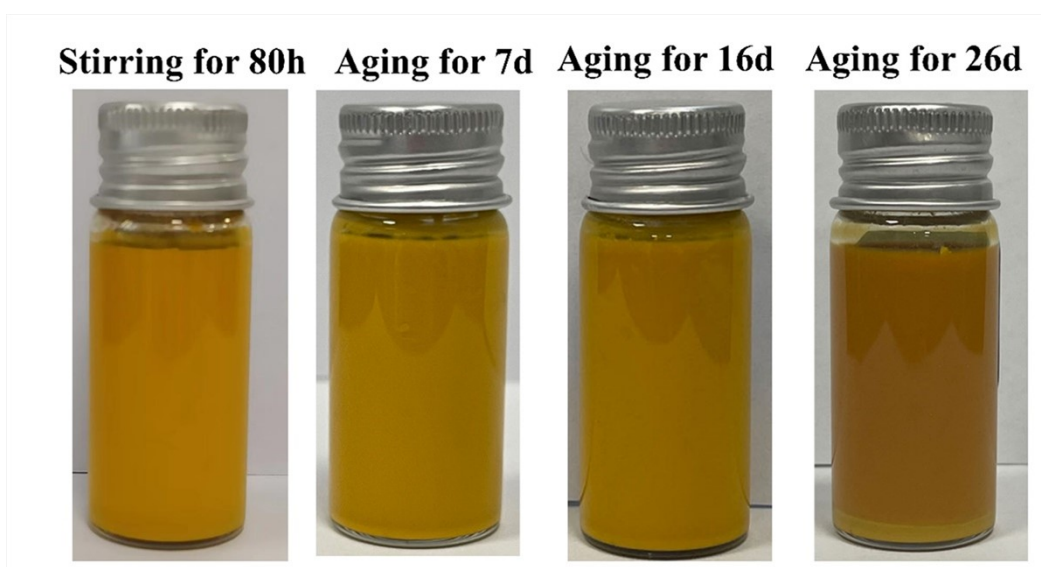

Figure S3. Commercialized  $V_2O_5$  powder in DI water is stirred for 80h, aged for 7, 16 and 26 days respectively (Photographs taken after retrieval of samples and shaking well for the first three times and then shooting).

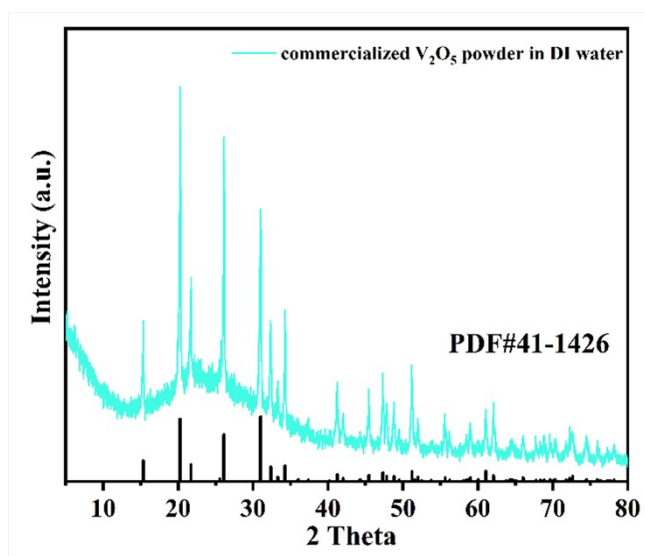

Figure S4. XRD of commercialized  $V_2O_5$  powder in DI water sample.

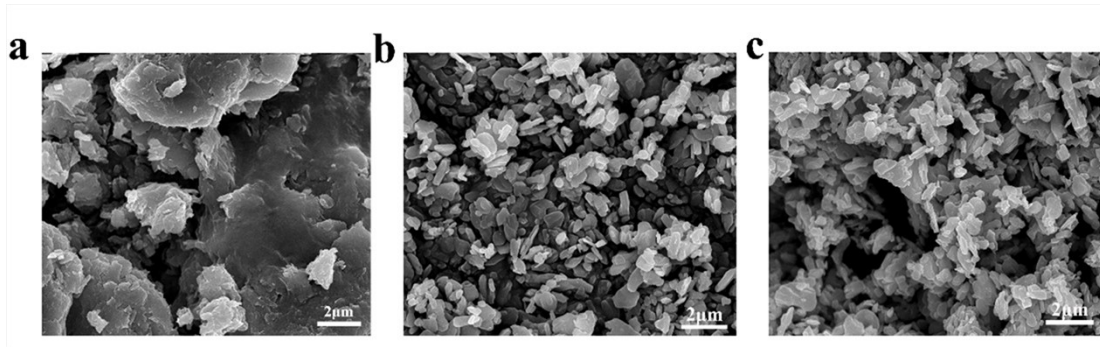

Figure S5. SEM images of VO (a), sample of commercialized V<sub>2</sub>O<sub>5</sub> powder in DI water (b), and commercialized V<sub>2</sub>O<sub>5</sub> powder (c).

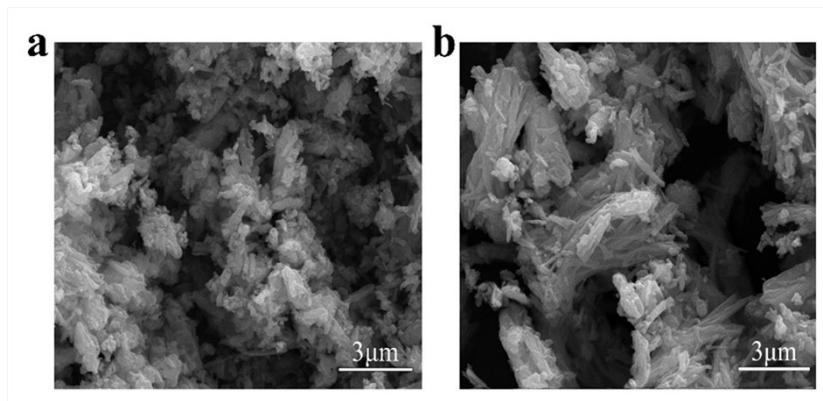

Figure S6. SEM images of MgVO I (a) and MgVO II (b).

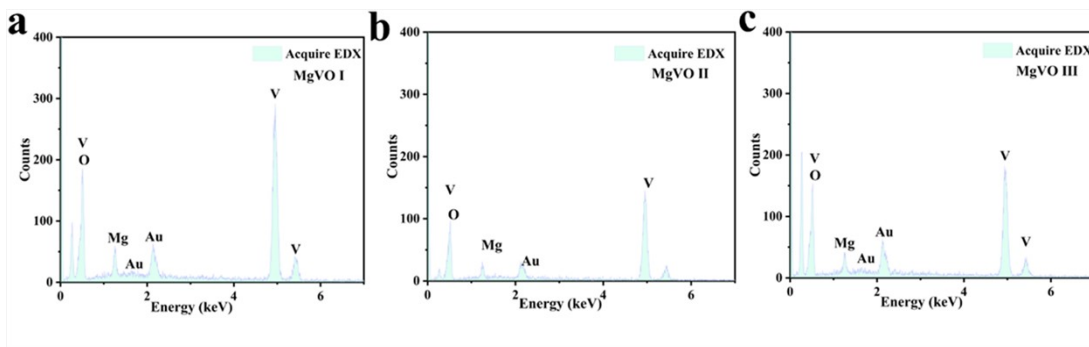

Figure S7. EDX patterns of MgVO I (a), MgVO II (b) and MgVO III (c).

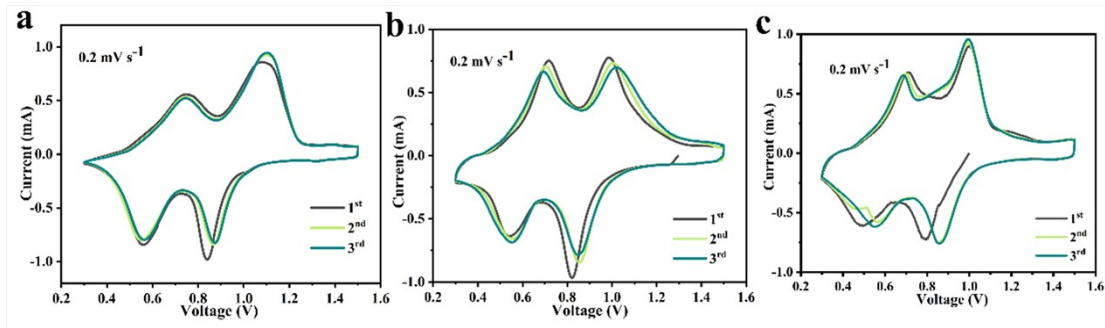

Figure S8. CV curves of MgVO at a scan rate of 0.2 mV s<sup>-1</sup>: (a) VO, (b) MgVO I, (c) MgVO II.

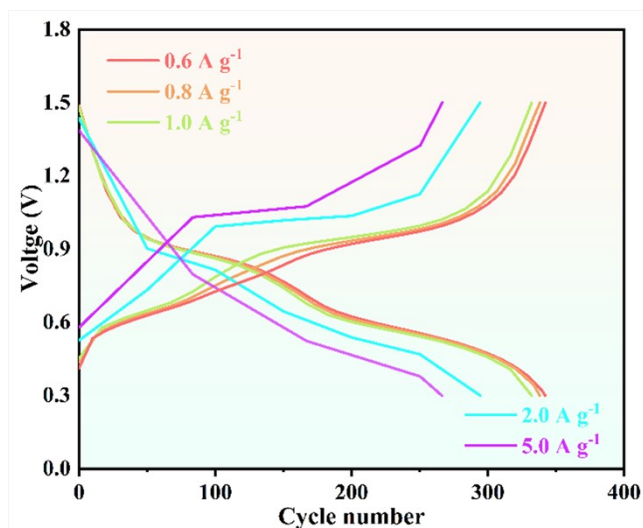

Figure S9. GCD plot of MgVO III at different current densities.

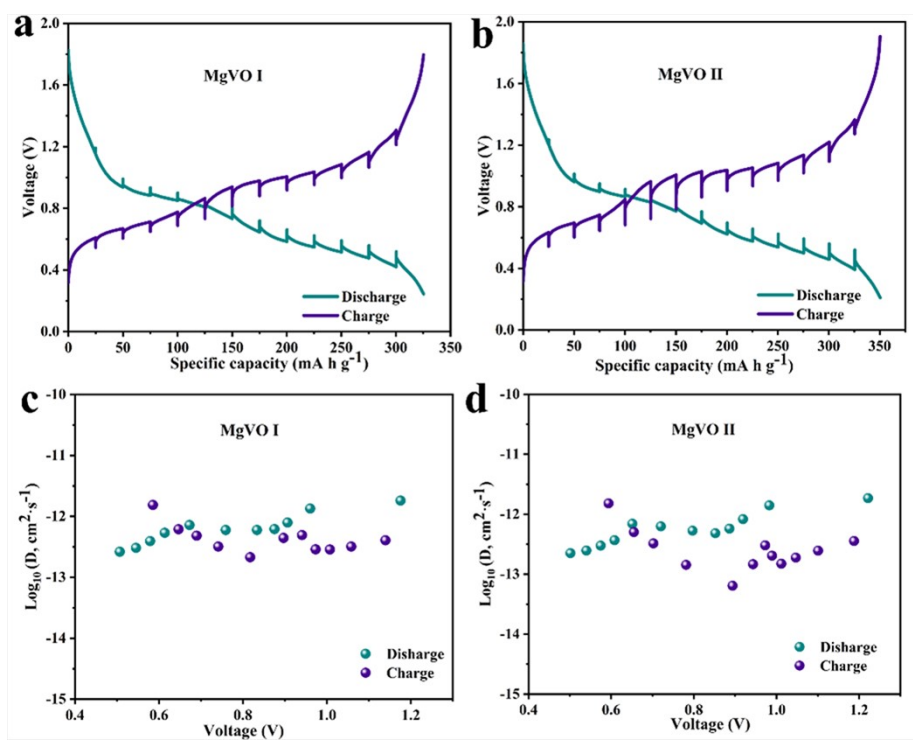

Figure S10. (a, c) Discharge-charge curve of MgVO I in the GITT measurement and the corresponding diffusivity coefficient of  $Zn^{2+}$ , (b, d) Discharge-charge curve of MgVO II in the GITT measurement and the corresponding diffusivity coefficient of  $Zn^{2+}$ .

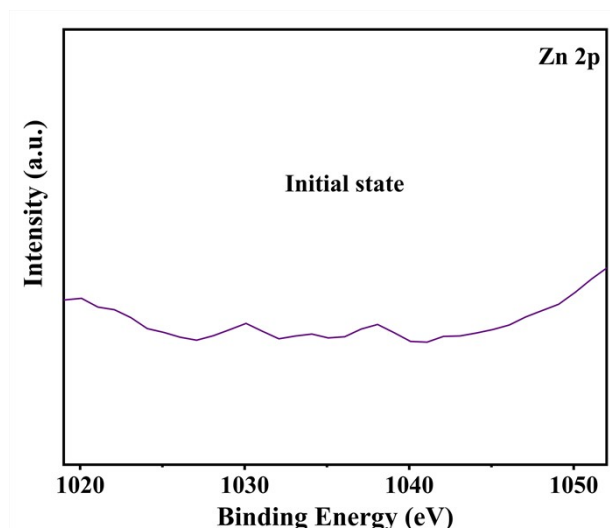

Figure S11. The XPS spectrum of MgVO III: Zn 2p.

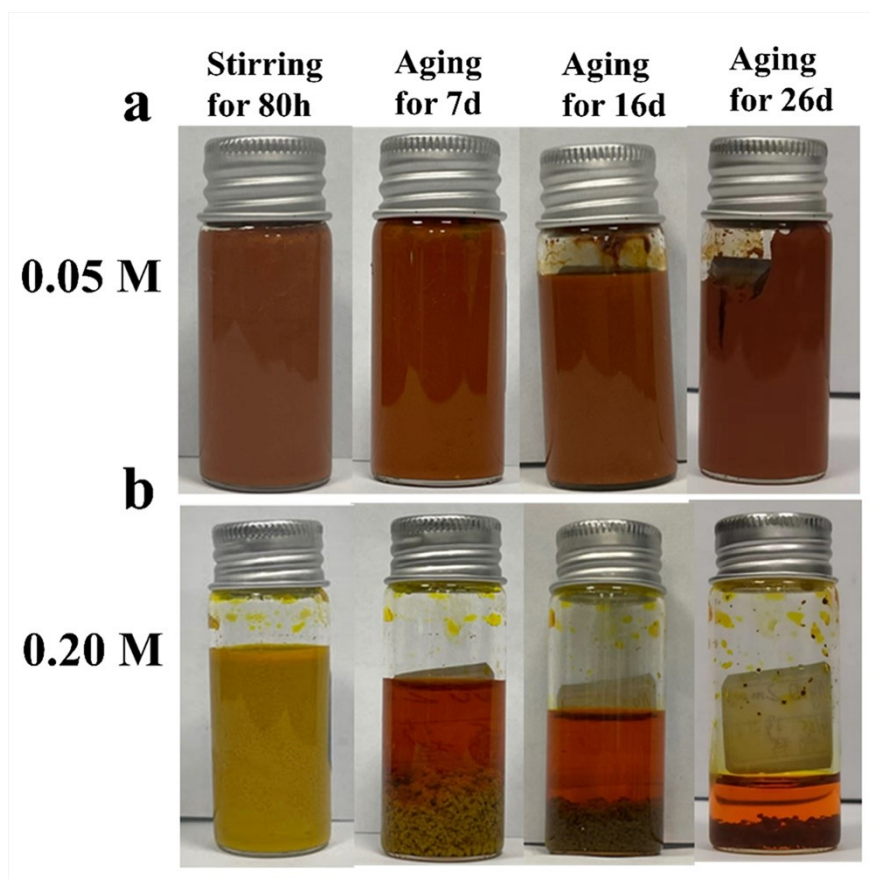

Figure S12. MgVO 0.5 (a) and MgVO 2.0 (b) samples are stirred for 80h, aged for 7, 16 and 26 days respectively (Photographs taken after retrieval of samples).

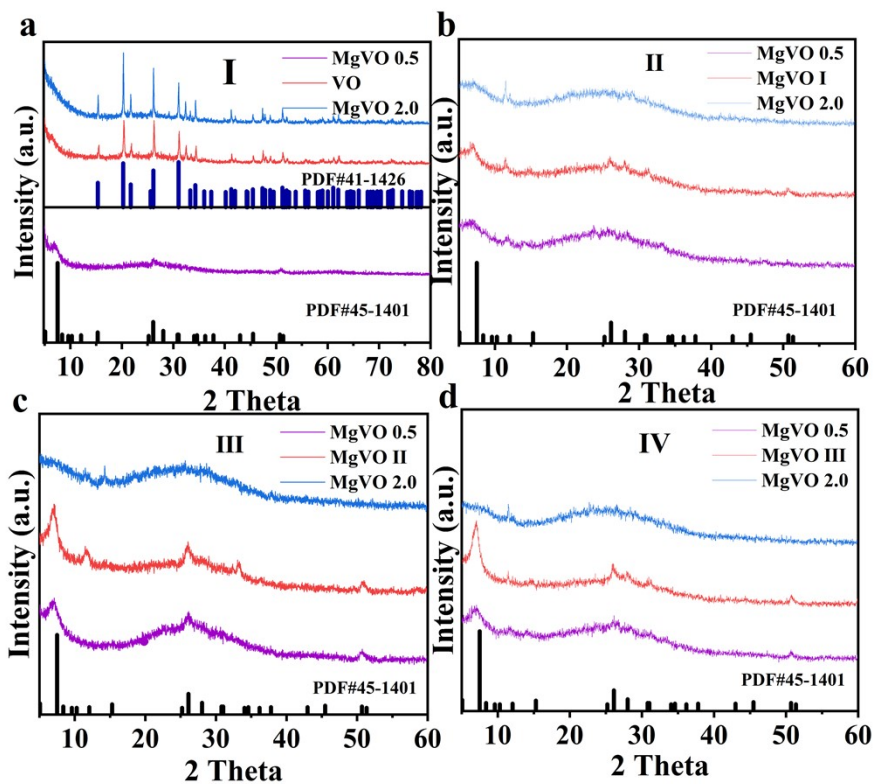

Figure S13. XRD of MgVO 0.5, MgVO, MgVO 2.0 samples: (a) stirring for 80h, (b) aging for 7 days, (c) aging for 16 days, (d) aging for 26 days.

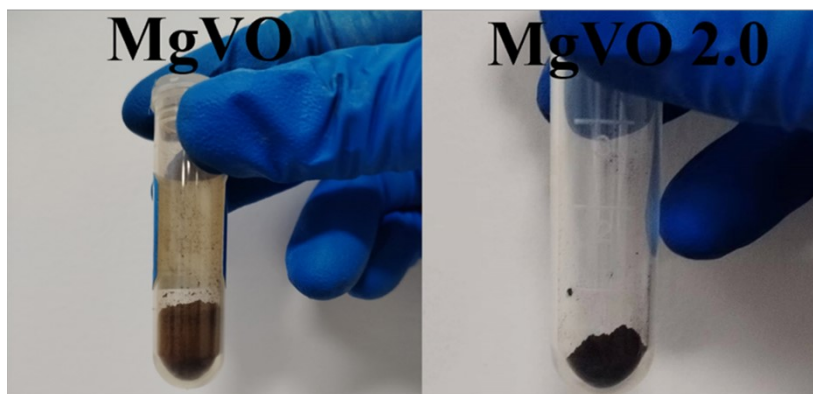

Figure S14. Powders after centrifugal drying of MgVO and MgVO 2.0.

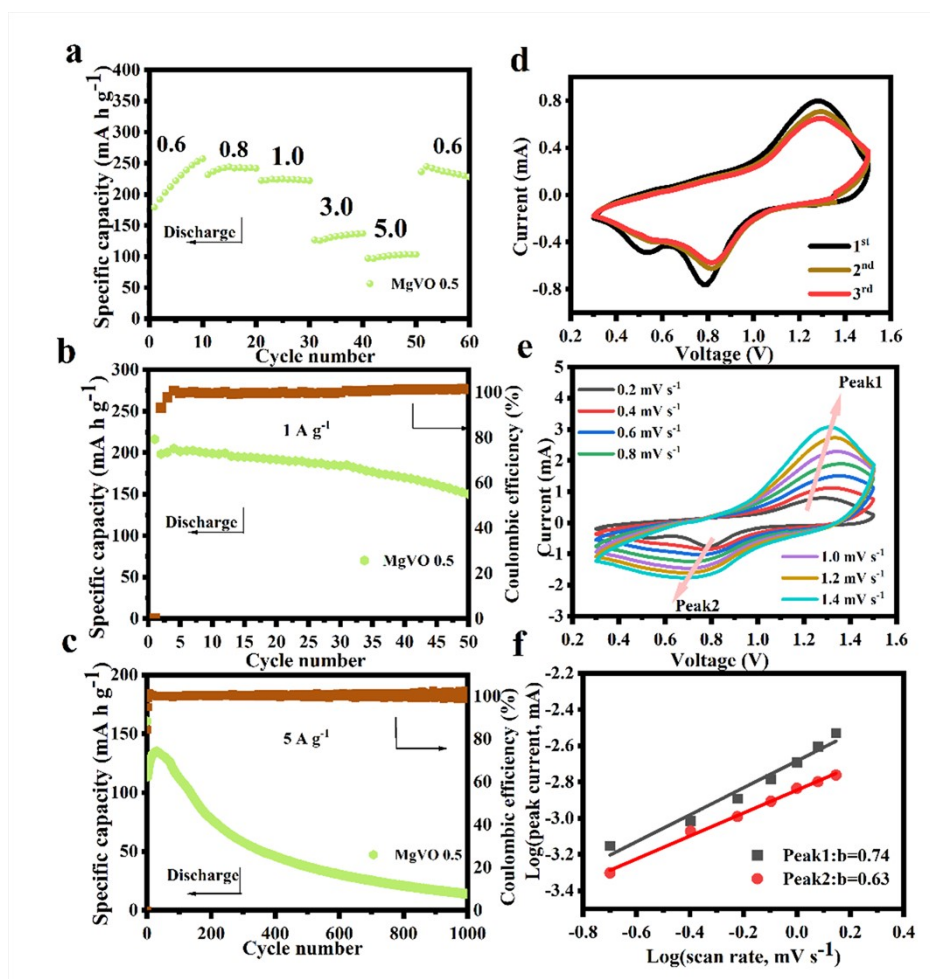

Figure S15. The electrochemical behavior of MgVO 0.5 when the cell is discharge: (a) Rate performance, (b-c) Cycling performance at a current density of  $1 \text{ A g}^{-1}$ ,  $5 \text{ A g}^{-1}$ , respectively. The reaction kinetics of MgVO 0.5 (d) The CV of MgVO 0.5 in the first three cycles at  $0.2 \text{ mV s}^{-1}$ . (e) The CV of MgVO 0.5 at scan rates of  $0.2 \text{ mV s}^{-1}$ - $1.4 \text{ mV s}^{-1}$ , and (f)  $\text{Log}(i)$  vs  $\text{log}(v)$  plot of MgVO 0.5.

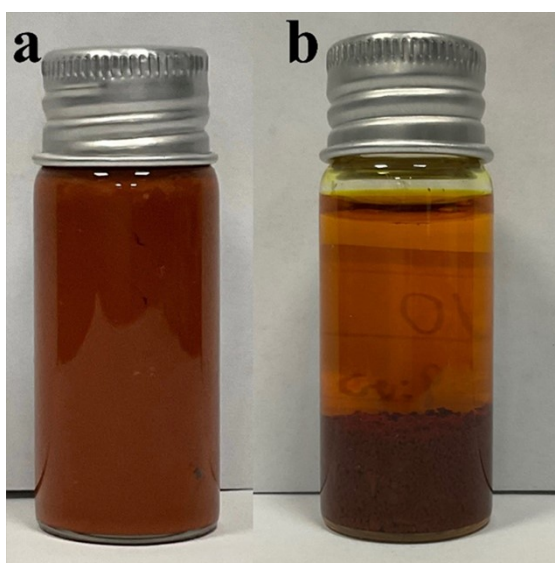

Figure S16. (a) CuVO, and (b) ZnVO sample.

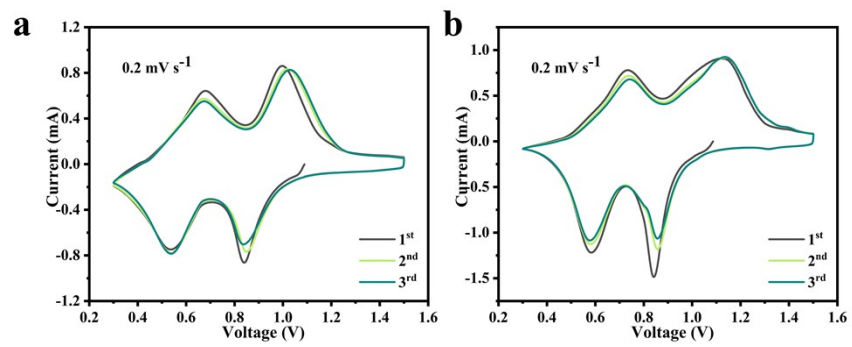

Figure S17. The first three cycles of CV curves of (a) CuVO, and (b) ZnVO at a scan rate of  $0.2 \text{ mV s}^{-1}$ .



**Table S1. Texture coefficient ratio of TC<sub>(001)</sub>/TC<sub>(MgVO III (001))</sub>.**

| (001) plane                   | TC (%) |
|-------------------------------|--------|
| MgVO I (001)/MgVO III (001)   | 0.30   |
| MgVO II (001)/MgVO III (001)  | 0.63   |
| MgVO III (001)/MgVO III (001) | 1.00   |

**Table S2. EDX data for MgVO ( I , II , III)**

| Sample   | Element | Weight (%) | Atom (%) |
|----------|---------|------------|----------|
| MgVO I   | Mg      | 2.80       | 2.60     |
|          | V       | 41.00      | 18.16    |
| MgVO II  | Mg      | 2.96       | 2.81     |
|          | V       | 43.04      | 19.46    |
| MgVO III | Mg      | 2.75       | 2.48     |
|          | V       | 37.84      | 16.26    |

**Table S3. ICP-MS data for MgVO III**

| Element | Elemental content C <sub>x</sub> (mg/kg) | Elemental content W (%) |
|---------|------------------------------------------|-------------------------|
| V       | 482995.95                                | 48.300%                 |
| Mg      | 26356.28                                 | 2.636%                  |

**Table S4. Performance comparison of MgVO III and other vanadium-based materials**

| Cathode materials                                                                                  | Electrochemical performance                                                                    | Reference |
|----------------------------------------------------------------------------------------------------|------------------------------------------------------------------------------------------------|-----------|
| Mg <sub>0.57</sub> V <sub>5</sub> O <sub>12</sub> ·2.3H <sub>2</sub> O                             | 5 A g <sup>-1</sup> , 232.5 mA h g <sup>-1</sup> after 1400 cycles, 94%                        | This work |
| Ba <sub>0.26</sub> V <sub>2</sub> O <sub>5</sub> ·0.92H <sub>2</sub> O                             | 5 A g <sup>-1</sup> , maximum capacity up to 133.4 mA h g <sup>-1</sup>                        | 1         |
| V <sub>3</sub> O <sub>7</sub> ·H <sub>2</sub> O                                                    | 5 A g <sup>-1</sup> , 171.6 mA h g <sup>-1</sup> after 1000 cycles, 85%                        | 2         |
| CuV <sub>2</sub> O <sub>6</sub>                                                                    | 5 A g <sup>-1</sup> , 143 mA h g <sup>-1</sup> after 1200 cycles                               | 3         |
| Od-HVO/rG                                                                                          | 5 A g <sup>-1</sup> , 276 mA h g <sup>-1</sup> after 750 cycles, 119.4%                        | 4         |
| H <sub>11</sub> Al <sub>2</sub> V <sub>6</sub> O <sub>23.2</sub>                                   | 5 A g <sup>-1</sup> , 141 mA h g <sup>-1</sup> after 7000 cycles, 118% of the initial capacity | 5         |
| Cr <sub>0.09</sub> V <sub>2</sub> O <sub>5</sub> (H <sub>2</sub> O) <sub>2</sub> ·H <sub>2</sub> O | 5 A g <sup>-1</sup> , 205 mA h g <sup>-1</sup> after 1000 cycles, 96%                          | 6         |

**Table S5. Charge/discharge of MgVO III corresponds to EDX**

| <b>Operational status</b> | <b>Element</b> | <b>Weight (%)</b> | <b>Atom (%)</b> |
|---------------------------|----------------|-------------------|-----------------|
| <b>Discharge</b>          | <b>Mg</b>      | <b>0.13</b>       | <b>0.11</b>     |
|                           | <b>V</b>       | <b>4.07</b>       | <b>1.63</b>     |
|                           | <b>Zn</b>      | <b>26.13</b>      | <b>8.17</b>     |
| <b>Charge</b>             | <b>Mg</b>      | <b>0.08</b>       | <b>0.05</b>     |
|                           | <b>V</b>       | <b>22.44</b>      | <b>7.33</b>     |
|                           | <b>Zn</b>      | <b>3.29</b>       | <b>0.84</b>     |

### Notes and references:

1. S. Luo, X. Cao, Q. Su, Y. Zhang, S. Liu, X. Xie, S. Liang and A. Pan, ACS Applied Energy Materials, 2021, 4, 6197-6204.
2. Z. Cao, H. Chu, H. Zhang, Y. Ge, R. Clemente, P. Dong, L. Wang, J. Shen, M. Ye and P. M. Ajayan, Journal of Materials Chemistry A, 2019, 7, 25262-25267.
3. X. Yu, F. Hu, F. Cui, J. Zhao, C. Guan and K. Zhu, Dalton Transactions, 2020, 49, 1048-1055.
4. S. Huang, S. He, H. Qin and X. Hou, ACS Applied Materials & Interfaces, 2021, 13, 44379-44388.
5. T. Wei, Y. Liu, G. Yang and C. Wang, Energy Storage Materials, 2020, 30, 130-137.
6. W. Leng, X. Liu and Y. Gong, Chemical Engineering Journal, 2022, 431, 134034.
